# Supplementary material for: Cobalt salophen complexes for light-driven water oxidation
Source: Royal Society of Chemistry journal article supplement (doi:10.1039/c5cy02157j), 2016-01-01
Supplement: c5cy02157j1.pdf [file c5cy02157j1.pdf]

## SUPPORTING INFORMATION

### **Cobalt salophen complexes for light-driven water oxidation**

Md. Ali Asraf,<sup>abe</sup> Hussein A. Younus,<sup>abf</sup> Chizoba I. Ezugwu,<sup>ab</sup> Akshay Mehta<sup>ab</sup> and Francis Verpoort <sup>\*abcd</sup>

<sup>a</sup> *Laboratory of Organometallics, Catalysis and Ordered Materials, State Key Laboratory of Advanced Technology for Materials Synthesis and Processing; Center for Chemical and Material Engineering, Wuhan University of Technology, Wuhan 430070, China. E-mail: Francis@whut.edu.cn/[Francis.verpoort@ugent.be](mailto:Francis.verpoort@ugent.be), Tel.: +86 18701743583; Fax: +86 2787879468*

<sup>b</sup> *School of Chemistry, Chemical Engineering and Life Sciences, Wuhan University of Technology, Wuhan 430070, China*

<sup>c</sup> *Tomsk Polytechnic University, Lenin Avenue 30, 634050 Tomsk, Russian Federation.*

<sup>d</sup> *Ghent University, Global Campus Songdo, 119 Songdomunhwa-Ro, Yeonsu-Gu, Incheon, Korea.*

<sup>e</sup> *Department of Chemistry, Rajshahi University, Rajshahi-6205, Bangladesh.*

<sup>f</sup> *Chemistry Department, Faculty of Science, Fayoum University, Fayoum 63514, Egypt.*

#### **Contents:**

Figure S1: <sup>1</sup>H-NMR spectrum of the ligand, **Slp**

Figure S2: <sup>13</sup>C-NMR spectrum of the ligand, **Slp**

Figure S3: <sup>1</sup>H-NMR spectrum of the complex **1**

Figure S4: <sup>13</sup>C-NMR spectrum of the complex **1**

Figure S5: <sup>1</sup>H-NMR spectrum of the complex **2**

Figure S6: <sup>13</sup>C-NMR spectrum of the complex **2**

Figure S7: <sup>1</sup>H-NMR spectrum of the complex **3**

Figure S8: <sup>13</sup>C-NMR spectrum of the complex **3**

This report was created by ACD/NMR Processor Academic Edition. For more information go to [www.acdlabs.com/nmrproc/](http://www.acdlabs.com/nmrproc/)

3/30/2015 1:16:12 PM

|                        |                      |                      |                         |                  |                      |                        |          |
|------------------------|----------------------|----------------------|-------------------------|------------------|----------------------|------------------------|----------|
| Acquisition Time (sec) | 32768                | Comment              | salophen                | Date             | 25 Nov 2014 01:27:28 | Frequency (MHz)        | 500.20   |
| Date Stamp             | 25 Nov 2014 01:27:28 | File Name            | D:\NMR data\Ali\901.fid |                  | Owner                | nmr                    |          |
| Nucleus                | <sup>1</sup> H       | Number of Transients | 16                      | Origin           | spect                | Original Points Count  | 32768    |
| Points Count           | 32768                | Pulse Sequence       | zg30                    | Receiver Gain    | 94.75                | SW(cyclical) (Hz)      | 10000.00 |
| Spectrum Offset (Hz)   | 3088.9392            | Spectrum Type        | STANDARD                | Sweep Width (Hz) | 9999.70              | Solvent                | DMSO-d6  |
|                        |                      |                      |                         |                  |                      | Temperature (degree C) | 27.202   |

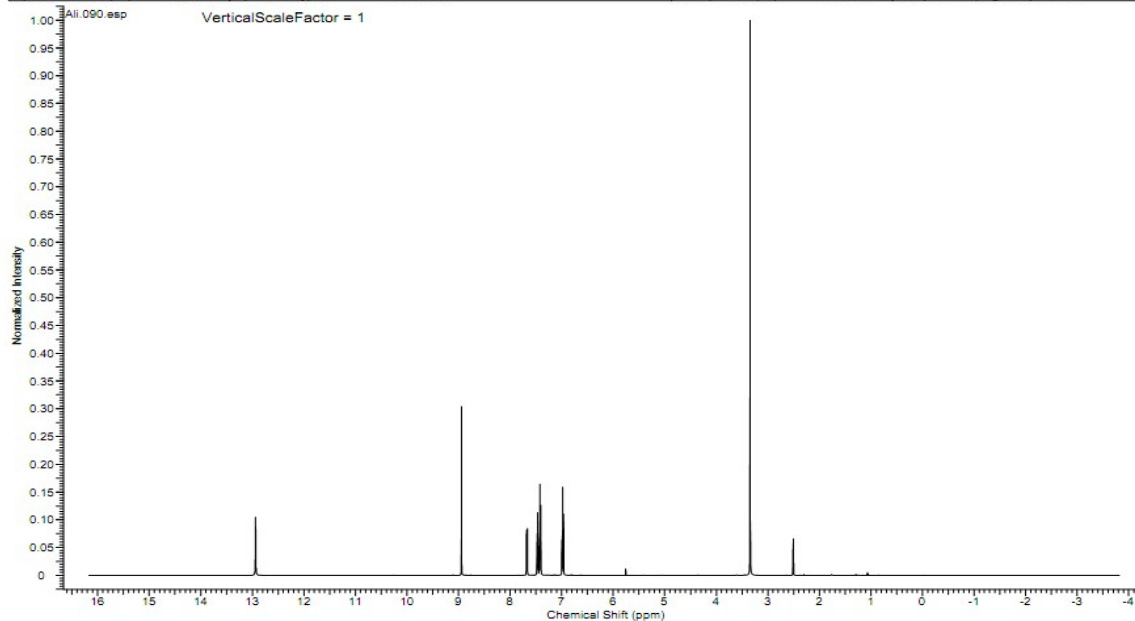

Figure S1: <sup>1</sup>H-NMR spectrum of the ligand, Slp

This report was created by ACD/NMR Processor Academic Edition. For more information go to [www.acdlabs.com/nmrproc/](http://www.acdlabs.com/nmrproc/)

4/1/2015 11:13:41 AM

|                        |                      |                      |                                       |                  |                      |                        |          |
|------------------------|----------------------|----------------------|---------------------------------------|------------------|----------------------|------------------------|----------|
| Acquisition Time (sec) | 11010                | Comment              | Slp                                   | Date             | 25 Mar 2015 09:42:24 | Frequency (MHz)        | 125.78   |
| Date Stamp             | 25 Mar 2015 09:42:24 | File Name            | D:\NMR data\NMR_data for Slp\2015.fid |                  | Owner                | nmr                    |          |
| Nucleus                | <sup>13</sup> C      | Number of Transients | 1024                                  | Origin           | spect                | Original Points Count  | 32768    |
| Points Count           | 32768                | Pulse Sequence       | zgpg30                                | Receiver Gain    | 190.40               | SW(cyclical) (Hz)      | 29761.90 |
| Spectrum Offset (Hz)   | 29761.90             | Spectrum Type        | STANDARD                              | Sweep Width (Hz) | 29761.00             | Solvent                | DMSO-d6  |
|                        |                      |                      |                                       |                  |                      | Temperature (degree C) | 27.199   |

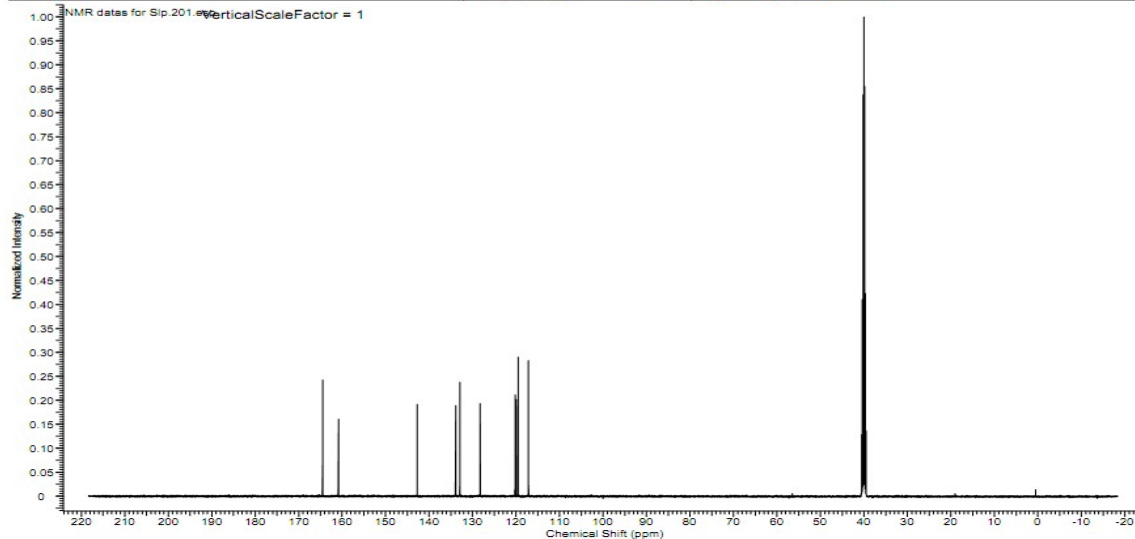

Figure S2: <sup>13</sup>C-NMR spectrum of the ligand, Slp

This report was created by ACD/NMR Processor Academic Edition. For more information go to [www.acdlabs.com/nmrproc/](http://www.acdlabs.com/nmrproc/)

4/1/2015 1:22:44 PM

|                        |                      |                      |          |                  |                      |                        |                           |                 |         |
|------------------------|----------------------|----------------------|----------|------------------|----------------------|------------------------|---------------------------|-----------------|---------|
| Acquisition Time (sec) | 3.2768               | Comment              | MAA003   | Date             | 09 Dec 2014 01:10:24 | File Name              | D:\NMR data\Ali-11150\fid | Frequency (MHz) | 500.20  |
| Date Stamp             | 09 Dec 2014 01:10:24 | Number of Transients | 16       | Origin           | spec1                | Original Points Count  | 32768                     | Owner           | nmr     |
| Nucleus                | <sup>1</sup> H       | Pulse Sequence       | zg30     | Receiver Gain    | 85.25                | SW (cycles)            | 10000.00                  | Solvent         | DMSO-d6 |
| Points Count           | 32768                | Spectrum Type        | STANDARD | Sweep Width (Hz) | 9999.70              | Temperature (degree C) | 27.200                    |                 |         |

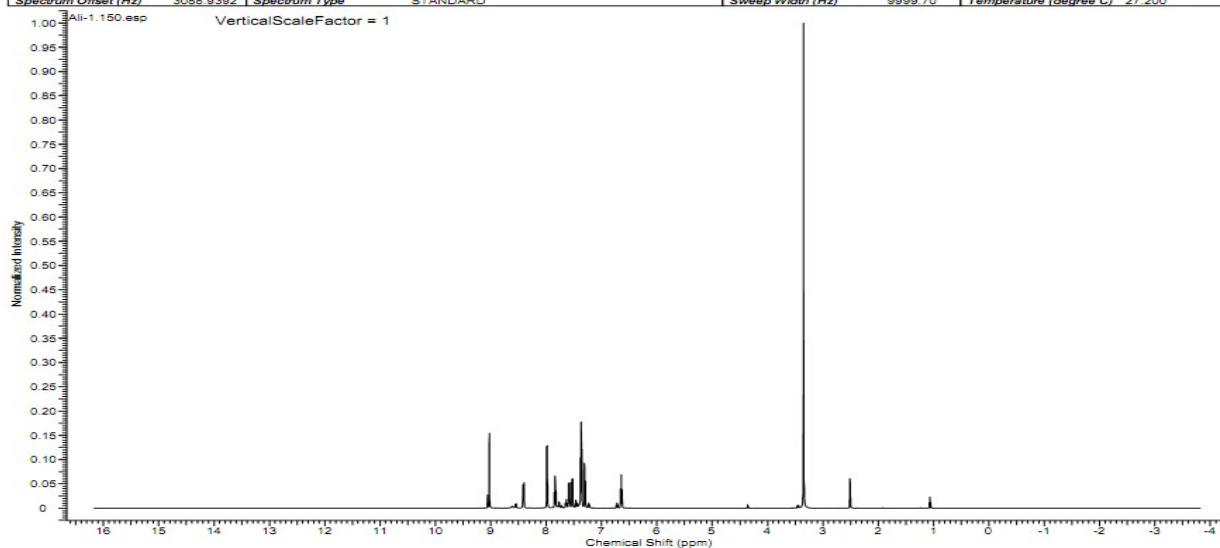

Figure S3: <sup>1</sup>H-NMR spectrum of the complex 1

This report was created by ACD/NMR Processor Academic Edition. For more information go to [www.acdlabs.com/nmrproc/](http://www.acdlabs.com/nmrproc/)

4/1/2015 2:16:17 PM

|                        |                      |                      |          |                  |                      |                        |                           |                 |         |
|------------------------|----------------------|----------------------|----------|------------------|----------------------|------------------------|---------------------------|-----------------|---------|
| Acquisition Time (sec) | 1.1010               | Comment              | MAA003   | Date             | 09 Dec 2014 02:05:52 | File Name              | D:\NMR data\Ali-11151\fid | Frequency (MHz) | 125.78  |
| Date Stamp             | 09 Dec 2014 02:05:52 | Number of Transients | 1024     | Origin           | spec1                | Original Points Count  | 32768                     | Owner           | nmr     |
| Nucleus                | <sup>13</sup> C      | Pulse Sequence       | zgpg30   | Receiver Gain    | 190.40               | SW (cycles)            | 29761.90                  | Solvent         | DMSO-d6 |
| Points Count           | 32768                | Spectrum Type        | STANDARD | Sweep Width (Hz) | 29761.90             | Temperature (degree C) | 27.199                    |                 |         |

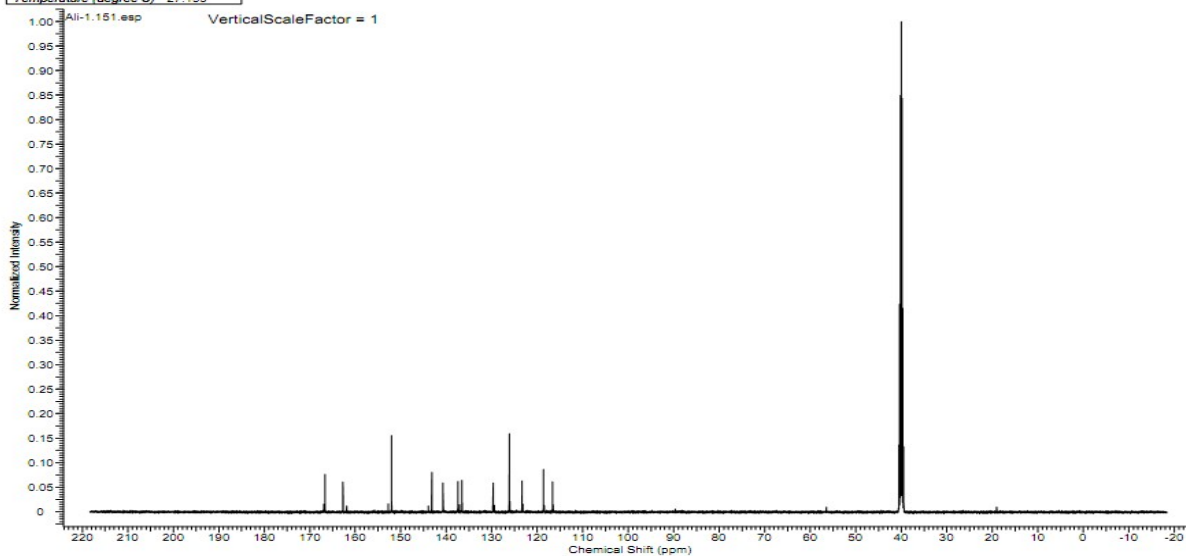

Figure S4: <sup>13</sup>C-NMR spectrum of the complex 1

This report was created by ACD/NMR Processor Academic Edition. For more information go to [www.acdlabs.com/nmrproc/](http://www.acdlabs.com/nmrproc/)

4/1/2015 4:19:26 PM

|                        |                      |                      |                            |                  |                      |                        |          |
|------------------------|----------------------|----------------------|----------------------------|------------------|----------------------|------------------------|----------|
| Acquisition Time (sec) | 3.2768               | Comment              | MAA001                     | Date             | 08 Dec 2014 23:08:48 | Frequency (MHz)        | 500.20   |
| Date Stamp             | 08 Dec 2014 23:08:48 | File Name            | D:\NMR data\Ali-111301.fid |                  | Owner                | nmr                    |          |
| Nucleus                | <sup>1</sup> H       | Number of Transients | 16                         | Origin           | spect                | Original Points Count  | 32768    |
| Points Count           | 32768                | Pulse Sequence       | zq30                       | Receiver Gain    | 108.18               | SW(cyclical) (Hz)      | 10000.00 |
| Spectrum Offset (Hz)   | 3088.9392            | Spectrum Type        | STANDARD                   | Sweep Width (Hz) | 9999.70              | Solvent                | DMSO-d6  |
|                        |                      |                      |                            |                  |                      | Temperature (degree C) | 27.200   |

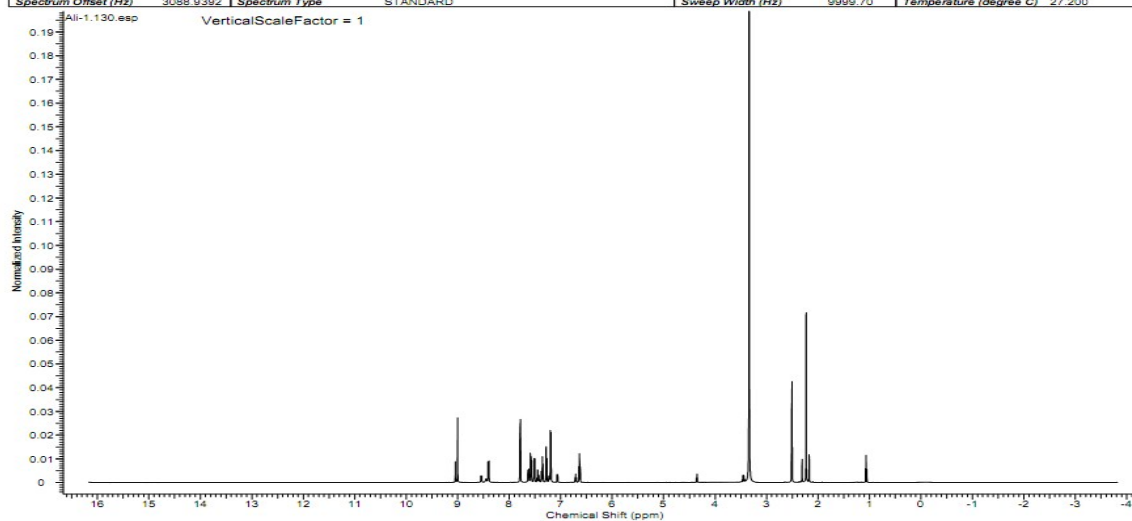

Figure S5: <sup>1</sup>H-NMR spectrum of the complex 2

This report was created by ACD/NMR Processor Academic Edition. For more information go to [www.acdlabs.com/nmrproc/](http://www.acdlabs.com/nmrproc/)

4/1/2015 4:51:39 PM

|                        |                      |                      |                            |                  |                      |                       |          |
|------------------------|----------------------|----------------------|----------------------------|------------------|----------------------|-----------------------|----------|
| Acquisition Time (sec) | 1.1010               | Comment              | MAA001                     | Date             | 09 Dec 2014 00:04:16 | Frequency (MHz)       | 125.78   |
| Date Stamp             | 09 Dec 2014 00:04:16 | File Name            | D:\NMR data\Ali-111311.fid |                  | Owner                | nmr                   |          |
| Nucleus                | <sup>13</sup> C      | Number of Transients | 1024                       | Origin           | spect                | Original Points Count | 32768    |
| Points Count           | 32768                | Pulse Sequence       | zq3030                     | Receiver Gain    | 190.40               | SW(cyclical) (Hz)     | 29761.00 |
| Spectrum Offset (Hz)   | 12576.9844           | Spectrum Type        | STANDARD                   | Sweep Width (Hz) | 29761.00             | Solvent               | DMSO-d6  |
| Temperature (degree C) | 27.200               |                      |                            |                  |                      |                       |          |

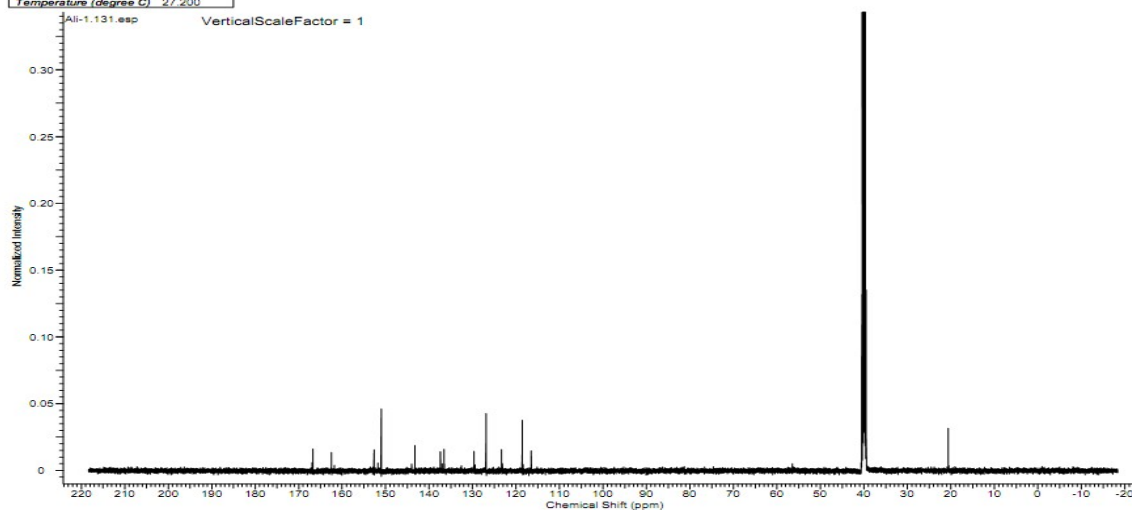

Figure S6: <sup>13</sup>C-NMR spectrum of the complex 2

This report was created by ACD/NMR Processor Academic Edition. For more information go to [www.acdlabs.com/nmrproc/](http://www.acdlabs.com/nmrproc/)

4/6/2015 1:39:43 PM

|                        |                      |                      |                          |                       |                      |                 |                        |        |
|------------------------|----------------------|----------------------|--------------------------|-----------------------|----------------------|-----------------|------------------------|--------|
| Acquisition Time (sec) | 3.2768               | Comment              | MAA002                   | Date                  | 09 Dec 2014 00:08:32 | Frequency (MHz) | 500.20                 |        |
| Date Stamp             | 09 Dec 2014 00:08:32 | File Name            | D:\NMR data\Ali-1140\fid |                       | Origin               | nmr             |                        |        |
| Nucleus                | <sup>1</sup> H       | Number of Transients | 16                       | Original Points Count | 32768                | Solvent         | DMSO-d6                |        |
| Points Count           | 32768                | Pulse Sequence       | zg30                     | Receiver Gain         | 94.75                | SW (cycles)     | 10000.00               |        |
| Spectrum Offset (Hz)   | 3088.9392            | Spectrum Type        | STANDARD                 |                       | Sweep Width (Hz)     | 9999.70         | Temperature (degree C) | 27.201 |

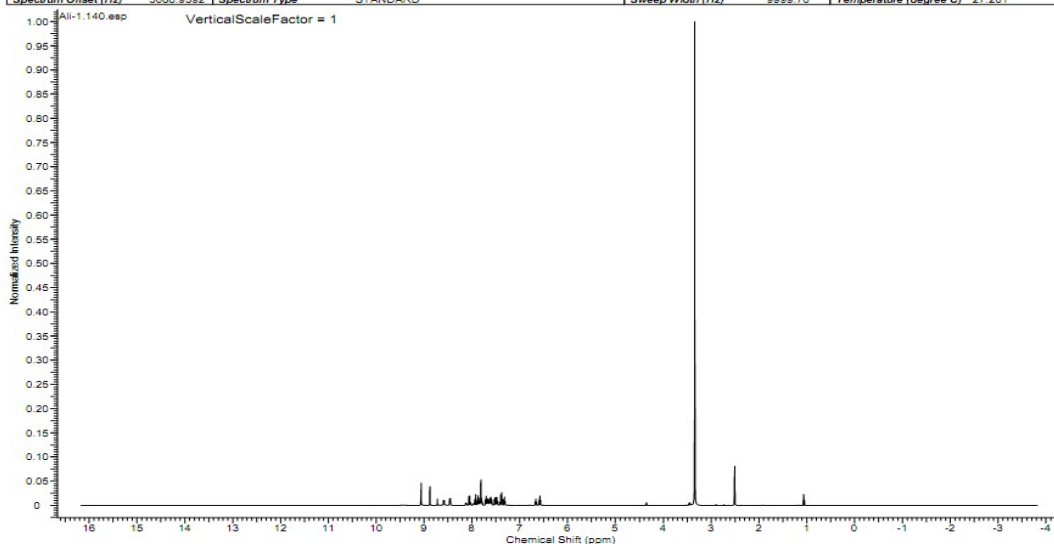

Figure S7: <sup>1</sup>H-NMR spectrum of the complex 3

This report was created by ACD/NMR Processor Academic Edition. For more information go to [www.acdlabs.com/nmrproc/](http://www.acdlabs.com/nmrproc/)

4/6/2015 2:38:08 PM

|                        |                      |                      |                          |                       |                      |                 |                        |        |
|------------------------|----------------------|----------------------|--------------------------|-----------------------|----------------------|-----------------|------------------------|--------|
| Acquisition Time (sec) | 1.1010               | Comment              | MAA002                   | Date                  | 09 Dec 2014 01:04:00 | Frequency (MHz) | 125.78                 |        |
| Date Stamp             | 09 Dec 2014 01:04:00 | File Name            | D:\NMR data\Ali-1141\fid |                       | Origin               | nmr             |                        |        |
| Nucleus                | <sup>13</sup> C      | Number of Transients | 1024                     | Original Points Count | 32768                | Solvent         | DMSO-d6                |        |
| Points Count           | 32768                | Pulse Sequence       | zgpg30                   | Receiver Gain         | 190.40               | SW (cycles)     | 29781.90               |        |
| Spectrum Offset (Hz)   | 12379.3844           | Spectrum Type        | STANDARD                 |                       | Sweep Width (Hz)     | 29781.00        | Temperature (degree C) | 27.199 |

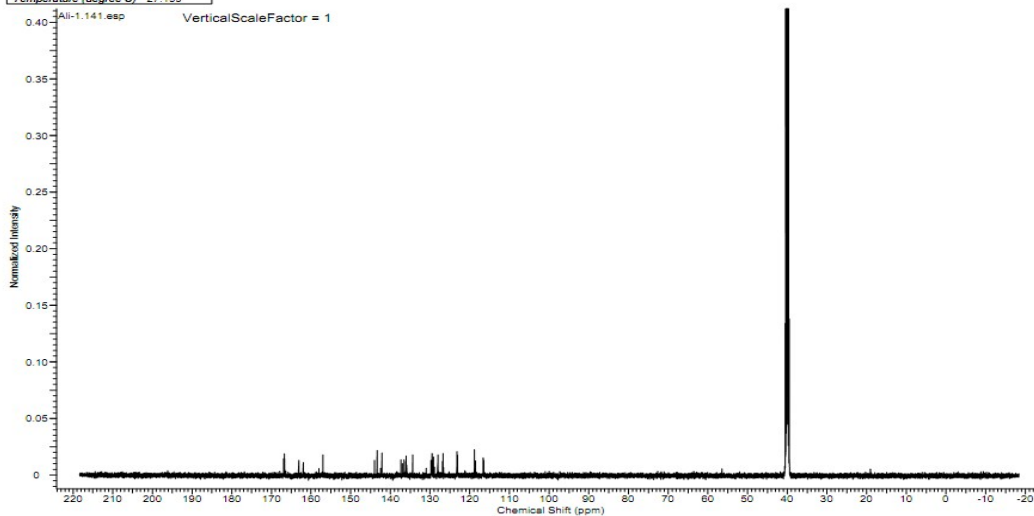

Figure S8: <sup>13</sup>C-NMR spectrum of the complex 3
